# Supplementary material
Source: publisher figshare collection journal article supplement (https://tandf.figshare.com/ndownloader/files/29038640)
Supplement: Supplementary file 1 [file 29038640]

## Supplemental online material

Figure S1

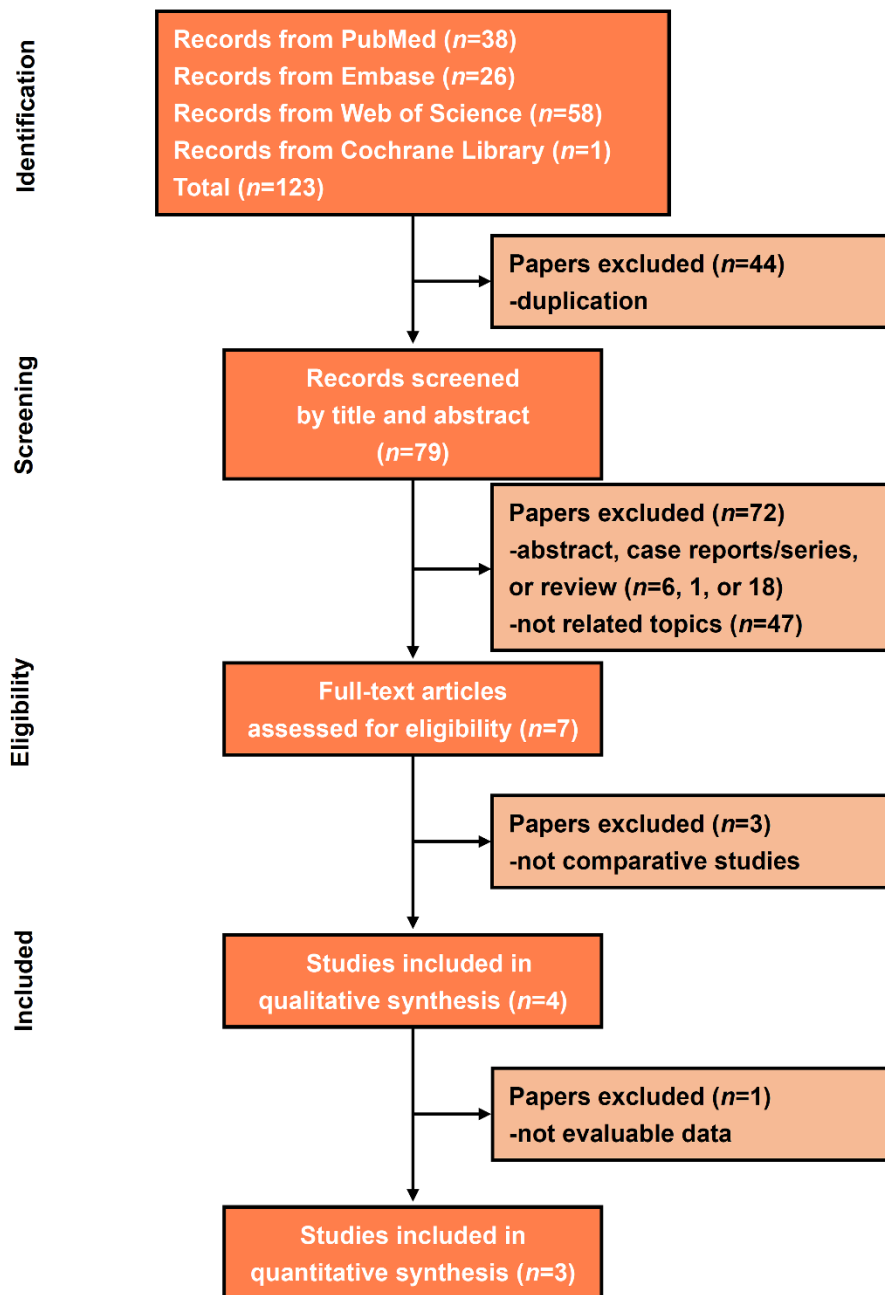

Figure S1 PRISMA flowchart of the study selection process

Figure S2

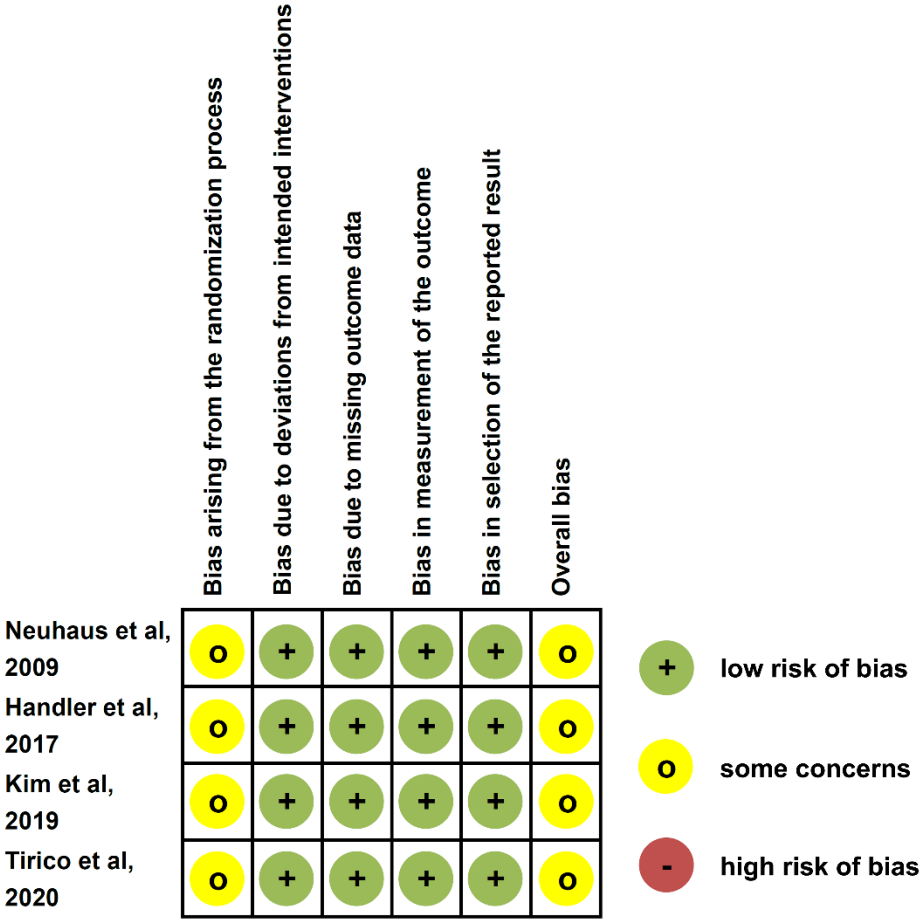

Figure S2 Study quality assessment using the Cochrane risk of bias 2.0 tool
